# Supplementary material for: Association Between Peripheral Blood Cell Count Abnormalities and Health-Related Quality of Life in the General Population
Source: PubMed Central journal article supplement — Hemasphere. 2020 Dec 21;5(1):e503. doi: 10.1097/HS9.0000000000000503 (PMC7755519; doi:10.1097/hs9.0000000000000503), 2020-12-21

|                                       | Leukopenia             | Normal                 | Leukocytosis           | P value | Thrombocyto-<br>penia  | Normal                 | Thrombocytos<br>is     | P value |
|---------------------------------------|------------------------|------------------------|------------------------|---------|------------------------|------------------------|------------------------|---------|
| <b>Number</b>                         | 7895                   | 131364                 | 3932                   |         | 2312                   | 139239                 | 1640                   |         |
| <b>Male sex (%)</b>                   | 38.4                   | 41.9                   | 37.5                   | <0.001  | 68.6                   | 41.5                   | 13.4                   | <0.001  |
| <b>Age (years)</b>                    | 46.4 ± 12.4            | 44.3 ± 12.8            | 42.8 ± 11.3            | <0.001  | 47.5 ± 14.4            | 44.4 ± 12.7            | 43.5 ± 11.7            | <0.001  |
| <b>BMI (kg/m<sup>2</sup>)</b>         | 24.4 ± 3.4             | 26.1 ± 4.3             | 27.2 ± 5.3             | <0.001  | 25.9 ± 4.0             | 26.0 ± 4.3             | 26.8 ± 5.2             | <0.001  |
| <b>Smoking</b>                        |                        |                        |                        | <0.001  |                        |                        |                        | <0.001  |
| Current/former/<br>never              | 6.9/38.5/54.6          | 20.3/33.1/46.6         | 68.2/13.3/18.5         |         | 17.8/36.4/45.8         | 20.9/32.8/46.3         | 28.2/30.0/41.8         |         |
| <b>Number of<br/>medications used</b> | 0 (0 – 1)              | 1 (0 – 2)              | 1 (0 – 3)              | <0.001  | 0 (0 – 2)              | 1 (0 – 2)              | 1 (0 – 2)              | <0.001  |
| <b>Alcohol use</b>                    |                        |                        |                        | <0.001  |                        |                        |                        | <0.001  |
| Non/light/<br>moderate/heavy          | 19.6/51.9/<br>21.7/6.8 | 21.3/50.2/<br>20.4/8.1 | 28.3/43.0/<br>18.0/3.6 |         | 19.2/48.4/<br>21.4/2.2 | 21.3/50.2/<br>20.4/8.1 | 35.2/46.5/<br>13.2/5.2 |         |
| <b>Anemia (%)</b>                     | 9.0                    | 3.9                    | 2.6                    | <0.001  | 4.5                    | 4.0                    | 18.3                   | <0.001  |
| <b>MCV (fL)</b>                       | 89.9 ± 4.5             | 89.8 ± 4.1             | 91.2 ± 4.6             | <0.001  | 89.6 ± 4.5             | 89.9 ± 4.1             | 88.3 ± 6.7             | <0.001  |
|                                       | Neutropenia            | Normal                 | Neutrophilia           | P value | Lymphopenia            | Normal                 | Lymphocytosis          | P value |
| <b>Number</b>                         | 6756                   | 13214                  | 2020                   |         | 473                    | 134530                 | 5887                   |         |
| <b>Male sex (%)</b>                   | 37.4                   | 41.8                   | 34.5                   | <0.001  | 48.4                   | 41.8                   | 34.8                   | <0.001  |
| <b>Age (years)</b>                    | 45.4 ± 13.8            | 44.4 ± 12.7            | 42.6 ± 10.6            | <0.001  | 47.8 ± 12.0            | 44.5 ± 12.7            | 41.3 ± 14.0            | <0.001  |
| <b>BMI (kg/m<sup>2</sup>)</b>         | 24.3 ± 3.4             | 26.1 ± 4.3             | 26.7 ± 5.3             | <0.001  | 25.1 ± 3.7             | 26.0 ± 4.3             | 26.8 ± 5.1             | <0.001  |
| <b>Smoking</b>                        |                        |                        |                        | <0.001  |                        |                        |                        | <0.001  |
| Current/former/<br>never              | 8.8/37.3/53.9          | 20.5/33.1/46.5         | 60.8/15.1/24.1         |         | 11.8/36.7/51.5         | 19.3/33.6/47.2         | 49.2/20.2/30.6         |         |
| <b>Number of<br/>medications used</b> | 0 (0 – 1)              | 1 (0 – 2)              | 1 (0 – 2)              | <0.001  | 0 (0 – 3)              | 1 (0 – 2)              | 1 (0 – 2)              | <0.001  |
| <b>Alcohol use</b>                    |                        |                        |                        | <0.001  |                        |                        |                        | <0.001  |
| Non/light/<br>moderate/heavy          | 17.3/52.6/<br>22.5/7.6 | 21.5/50.1/<br>20.3/8.1 | 27.7/45.7/<br>17.6/9.0 |         | 21.6/50.7/<br>19.7/8.1 | 21.3/50.3/<br>20.4/8.0 | 23.0/48.3/<br>19.0/9.6 |         |

|                                       |                            |                          |                                        |                |                                        |                                               |                                |                |
|---------------------------------------|----------------------------|--------------------------|----------------------------------------|----------------|----------------------------------------|-----------------------------------------------|--------------------------------|----------------|
| <b>Anemia (%)</b>                     | 7.5                        | 4.0                      | 3.0                                    | <0.001         | 9.1                                    | 4.3                                           | 2.3                            | <0.001         |
| <b>MCV (fL)</b>                       | 90.0 ± 4.3                 | 89.8 ± 4.2               | 91.3 ± 4.6                             | <0.001         | 90.1 ± 4.9                             | 89.8 ± 4.2                                    | 90.6 ± 4.2                     | <0.001         |
|                                       | <b>Monocyto-<br/>penia</b> | <b>Normal</b>            | <b>Monocytosis</b>                     | <b>P value</b> |                                        | <b>Normal</b>                                 | <b>Basophilia</b>              | <b>P value</b> |
| <b>Number</b>                         | 9713                       | 129056                   | 2121                                   |                |                                        | <b>140877</b>                                 | 13                             |                |
| <b>Male sex (%)</b>                   | 25.9                       | 42.3                     | 62.5                                   | <0.001         |                                        | 41.5                                          | 46.2                           | 0.734          |
| <b>Age (years)</b>                    | 43.4 ± 11.8                | 44.5 ± 12.8              | 45.4 ± 13.4                            | <0.001         |                                        | 44.4 ± 12.7                                   | 52.4 ± 8.2                     | 0.024          |
| <b>BMI (kg/m<sup>2</sup>)</b>         | 24.8 ± 3.8                 | 26.1 ± 4.3               | 26.8 ± 4.8                             | <0.001         |                                        | 26.0 ± 4.3                                    | 26.3 ± 7.1                     | 0.567          |
| <b>Smoking</b>                        |                            |                          |                                        | <0.001         |                                        |                                               |                                | 0.066          |
| Current/former/<br>never              | 9.7/36.4/53.9              | 20.8/32.9/46.3           | 54.3/22.1/23.6                         |                |                                        | 20.5/33.0/46.5                                | 38.5/46.2/15.4                 |                |
| <b>Number of<br/>medications used</b> | 1 (0 – 1)                  | 1 (0 – 2)                | 1 (0 – 2)                              | <0.001         |                                        | 1 (0 – 2)                                     | 1 (0 – 2)                      | 0.978          |
| <b>Alcohol use</b>                    |                            |                          |                                        | <0.001         |                                        |                                               |                                | 0.675          |
| Non/light/<br>moderate/heavy          | 22.9/54.4/<br>18.0/4.7     | 21.3/50.0/<br>20.5/8.2   | 21.3/40.9/<br>22.4/2.7                 |                |                                        | 21.4/50.2<br>20.4/8.1                         | 16.7/41.7/<br>25.0/16.7        |                |
| <b>Anemia (%)</b>                     | 6.4                        | 2.0                      | 2.9                                    | <0.001         |                                        | 4.1                                           | 7.7                            | 0.520          |
| <b>MCV (fL)</b>                       | 89.6 ± 4.2                 | 89.8 ± 4.2               | 91.2 ± 4.4                             | <0.001         |                                        | 89.8 ± 4.2                                    | 90.5 ± 8.7                     | 0.843          |
|                                       |                            | <b>Normal</b>            | <b>Eosinophilia</b>                    | <b>P value</b> | <b>1<sup>st</sup> quintile</b>         | <b>2<sup>nd</sup>-4<sup>th</sup> quintile</b> | <b>5<sup>th</sup> quintile</b> | <b>P value</b> |
| <b>Number</b>                         |                            | 133329                   | 7561                                   |                | 28201                                  | 84714                                         | 27975                          |                |
| <b>Male sex (%)</b>                   |                            | 41.0                     | 49.8                                   | <0.001         | 40.4                                   | 42.7                                          | 39.0                           | <0.001         |
| <b>Age (years)</b>                    |                            | 44.4 ± 12.7              | 44.0 ± 13.3                            | 0.007          | 43.3 ± 14.4                            | 44.4 ± 12.5                                   | 45.4 ± 11.7                    | <0.001         |
| <b>BMI (kg/m<sup>2</sup>)</b>         |                            | 26.0 ± 4.3               | 26.0 ± 4.3                             | 0.545          | 25.3 ± 3.9                             | 26.1 ± 4.3                                    | 26.4 ± 4.7                     | <0.001         |
| <b>Smoking</b>                        |                            |                          |                                        |                |                                        |                                               |                                |                |
| Current/former/<br>never              |                            | 9.9/33.2/46.9            | 30.9/29.1/40.1                         | <0.001         | 18.3/34.0/47.7                         | 20.4/33.0/46.6                                | 22.9/32.0/45.1                 | <0.001         |
| <b>Number of<br/>medications used</b> |                            | 1 (0 – 2)                | 1 (0 – 2)                              | <0.001         | 1 (0 – 2)                              | 1 (0 – 2)                                     | 1 (0 – 2)                      | <0.001         |
| <b>Alcohol use</b>                    |                            |                          |                                        | <0.001         |                                        |                                               |                                | <0.001         |
| Non/light/<br>moderate/heavy          |                            | 21.4/50.4/<br>17.8/51.4/ | 20.5/46.6/<br>21.3/50.2/<br>25.1/49.0/ |                | 17.8/51.4/<br>21.3/50.2/<br>25.1/49.0/ | 21.3/50.2/<br>25.1/49.0/                      | 25.1/49.0/<br>25.1/49.0/       |                |

|                   |            |            |        |            |            |            |        |
|-------------------|------------|------------|--------|------------|------------|------------|--------|
| moderate/heavy    | 20.2/7.9   | 22.6/10.3  |        | 21.6/8.8   | 20.4/8.0   | 18.5/7.4   |        |
| <b>Anemia (%)</b> | 3.9        | 0.2        | 0.005  | 3.8        | 4.0        | 5.0        | <0.001 |
| <b>MCV (fL)</b>   | 89.8 ± 4.2 | 90.1 ± 4.2 | <0.001 | 90.0 ± 4.0 | 89.8 ± 4.1 | 89.9 ± 4.5 | <0.001 |

**SDC, Table 1. Baseline characteristics for participants with and without peripheral blood cell count abnormalities.** Data are given as mean ± SD, median (IQR) when not normally distributed, or percentage. BMI, body mass index; IQR, interquartile range; MCV, mean corpuscular volume; SD, standard deviation.

|                                   | <b>Leukopenia</b>       |                     | <b>WBC in normal range</b>         |                     | <b>Leukocytosis</b>   |                     |
|-----------------------------------|-------------------------|---------------------|------------------------------------|---------------------|-----------------------|---------------------|
|                                   | Mean ± SD               | Median (IQR)        | Mean ± SD                          | Median (IQR)        | Mean ± SD             | Median (IQR)        |
| <b>Physical functioning</b>       | 92.0 ± 13.0             | 95.0 (90.0-100.0)   | 90.6 ± 14.2                        | 95.0 (90.0-100.0)   | 85.2 ± 19.6           | 90.0 (80.0-100.0)   |
| <b>Social functioning</b>         | 88.5 ± 17.3             | 100.0 (87.5-100.0)  | 87.7 ± 18.0                        | 100.0 (75.0-100.0)  | 83.0 ± 21.7           | 87.5 (75.0-100.0)   |
| <b>Physical role functioning</b>  | 87.1 ± 28.9             | 100.0 (100.0-100.0) | 86.8 ± 29.2                        | 100.0 (100.0-100.0) | 80.2 ± 34.6           | 100.0 (75.0-100.0)  |
| <b>Emotional role functioning</b> | 91.6 ± 24.2             | 100.0 (100.0-100.0) | 90.8 ± 29.2                        | 100.0 (100.0-100.0) | 86.0 ± 30.7           | 100.0 (100.0-100.0) |
| <b>Mental health</b>              | 80.2 ± 13.3             | 84.0 (72.0-88.0)    | 79.8 ± 13.7                        | 84.0 (72.0-88.0)    | 76.6 ± 16.2           | 80.0 (68.0-88.0)    |
| <b>Vitality</b>                   | 69.6 ± 16.7             | 70.0 (60.0-80.0)    | 67.9 ± 17.0                        | 70.0 (60.0-80.0)    | 62.6 ± 18.9           | 65.0 (50.0-75.0)    |
| <b>Bodily pain</b>                | 85.6 ± 18.2             | 89.8 (77.6-100.0)   | 84.5 ± 19.0                        | 89.8 (67.3-100.0)   | 79.8 ± 22.6           | 89.8 (67.3-100.0)   |
| <b>General health</b>             | 74.3 ± 16.4             | 75.0 (65.0-85.0)    | 72.0 ± 16.6                        | 75.0 (65.0-85.0)    | 65.2 ± 19.0           | 65.0 (55.0-80.0)    |
|                                   | <b>Thrombocytopenia</b> |                     | <b>Platelets in normal range</b>   |                     | <b>Thrombocytosis</b> |                     |
|                                   | Mean ± SD               | Median (IQR)        | Mean ± SD                          | Median (IQR)        | Mean ± SD             | Median (IQR)        |
| <b>Physical functioning</b>       | 90.4 ± 14.4             | 95.0 (90.0-100.0)   | 90.6 ± 14.3                        | 95.0 (90.0-100.0)   | 86.8 ± 18.1           | 95.0 (85.0-100.0)   |
| <b>Social functioning</b>         | 88.9 ± 17.3             | 100.0 (87.5-100.0)  | 87.6 ± 18.0                        | 100.0 (75.0-100.0)  | 84.1 ± 21.1           | 87.5 (75.0-100.0)   |
| <b>Physical role functioning</b>  | 86.2 ± 30.2             | 100.0 (100.0-100.0) | 86.7 ± 29.3                        | 100.0 (100.0-100.0) | 81.4 ± 33.8           | 100.0 (75.0-100.0)  |
| <b>Emotional role functioning</b> | 92.0 ± 23.5             | 100.0 (100.0-100.0) | 90.8 ± 25.3                        | 100.0 (100.0-100.0) | 88.3 ± 28.5           | 100.0 (100.0-100.0) |
| <b>Mental health</b>              | 81.7 ± 13.3             | 84.0 (72.0-92.0)    | 79.7 ± 13.8                        | 84.0 (72.0-88.0)    | 78.0 ± 14.9           | 80.0 (72.0-88.0)    |
| <b>Vitality</b>                   | 70.0 ± 17.1             | 73.3 (60.0-83.8)    | 67.9 ± 17.0                        | 70.0 (60.0-80.0)    | 64.3 ± 18.3           | 65.0 (50.0-75.0)    |
| <b>Bodily pain</b>                | 86.0 ± 18.4             | 100.0 (77.6-100.0)  | 84.5 ± 19.1                        | 89.8 (67.3-100.0)   | 80.1 ± 22.1           | 89.8 (67.3-100.0)   |
| <b>General health</b>             | 71.8 ± 17.0             | 75.0 (60.0-85.0)    | 72.0 ± 16.7                        | 75.0 (65.0-85.0)    | 68.3 ± 19.0           | 70.0 (60.0-80.0)    |
|                                   | <b>Neutropenia</b>      |                     | <b>Neutrophils in normal range</b> |                     | <b>Neutrophilia</b>   |                     |
|                                   | Mean ± SD               | Median (IQR)        | Mean ± SD                          | Median (IQR)        | Mean ± SD             | Median (IQR)        |
| <b>Physical functioning</b>       | 92.3 ± 12.6             | 95.0 (90.0-100.0)   | 90.6 ± 14.3                        | 95.0 (90.0-100.0)   | 86.2 ± 18.7           | 95.0 (80.0-100.0)   |
| <b>Social functioning</b>         | 88.6 ± 17.1             | 100.0 (87.5-100.0)  | 87.6 ± 18.0                        | 100.0 (75.0-100.0)  | 83.4 ± 21.6           | 87.5 (75.0-100.0)   |
| <b>Physical role functioning</b>  | 88.1 ± 27.8             | 100.0 (100.0-100.0) | 86.7 ± 29.3                        | 100.0 (100.0-100.0) | 81.3 ± 34.2           | 100.0 (75.0-100.0)  |
| <b>Emotional role functioning</b> | 91.9 ± 23.8             | 100.0 (100.0-100.0) | 90.8 ± 25.3                        | 100.0 (100.0-100.0) | 86.2 ± 30.3           | 100.0 (100.0-100.0) |
| <b>Mental health</b>              | 80.3 ± 13.1             | 84.0 (72.0-88.0)    | 79.8 ± 13.7                        | 84.0 (72.0-88.0)    | 76.8 ± 16.0           | 80.0 (68.0-88.0)    |
| <b>Vitality</b>                   | 69.9 ± 16.3             | 70.0 (60.0-80.0)    | 67.9 ± 17.0                        | 70.0 (60.0-80.0)    | 63.2 ± 18.6           | 65.0 (50.0-75.0)    |
| <b>Bodily pain</b>                | 85.7 ± 18.1             | 89.8 (77.6-100.0)   | 84.5 ± 19.1                        | 89.8 (67.3-100.0)   | 80.7 ± 22.4           | 89.8 (67.3-100.0)   |
| <b>General health</b>             | 74.5 ± 16.0             | 75.0 (65.0-85.0)    | 72.0 ± 16.7                        | 75.0 (65.0-85.0)    | 66.6 ± 19.1           | 70.0 (55.0-80.0)    |

|                                   | <b>Lymphopenia</b>         |                     | <b>Lymphocytes in normal range</b>                   |                     | <b>Lymphocytosis</b>        |                     |
|-----------------------------------|----------------------------|---------------------|------------------------------------------------------|---------------------|-----------------------------|---------------------|
|                                   | Mean ± SD                  | Median (IQR)        | Mean ± SD                                            | Median (IQR)        | Mean ± SD                   | Median (IQR)        |
| <b>Physical functioning</b>       | 87.2 ± 18.3                | 95.0 (85.0-100.0)   | 90.7 ± 14.1                                          | 95.0 (90.0-100.0)   | 87.9 ± 16.8                 | 95.0 (85.0-100.0)   |
| <b>Social functioning</b>         | 84.5 ± 21.7                | 100.0 (75.0-100.0)  | 87.8 ± 17.9                                          | 100.0 (100.0-100.0) | 84.9 ± 20.5                 | 100.0 (75.0-100.0)  |
| <b>Physical role functioning</b>  | 80.9 ± 34.9                | 100.0 (75.0-100.0)  | 86.8 ± 29.2                                          | 100.0 (100.0-100.0) | 83.2 ± 32.5                 | 100.0 (75.0-100.0)  |
| <b>Emotional role functioning</b> | 88.7 ± 28.3                | 100.0 (100.0-100.0) | 90.9 ± 25.1                                          | 100.0 (100.0-100.0) | 87.6 ± 29.1                 | 100.0 (100.0-100.0) |
| <b>Mental health</b>              | 79.9 ± 13.4                | 84.0 (72.0-88.0)    | 79.8 ± 13.6                                          | 84.0 (72.0-88.0)    | 77.5 ± 15.5                 | 80.0 (68.0-88.0)    |
| <b>Vitality</b>                   | 67.5 ± 18.9                | 70.0 (55.0-80.0)    | 68.1 ± 17.0                                          | 70.0 (60.0-80.0)    | 64.6 ± 18.3                 | 65.0 (50.0-80.0)    |
| <b>Bodily pain</b>                | 82.9 ± 21.3                | 89.8 (67.3-100.0)   | 84.6 ± 19.0                                          | 89.8 (67.3-100.0)   | 81.9 ± 21.1                 | 89.8 (67.3-100.0)   |
| <b>General health</b>             | 67.5 ± 21.3                | 75.0 (55.0-80.0)    | 72.2 ± 16.6                                          | 75.0 (65.0-85.0)    | 67.7 ± 18.2                 | 70.0 (55.0-80.0)    |
|                                   | <b>Monocytopenia</b>       |                     | <b>Monocytes in normal range</b>                     |                     | <b>Monocytosis</b>          |                     |
|                                   | Mean ± SD                  | Median (IQR)        | Mean ± SD                                            | Median (IQR)        | Mean ± SD                   | Median (IQR)        |
| <b>Physical functioning</b>       | 91.9 ± 13.0                | 95.0 (90.0-100.0)   | 90.6 ± 14.3                                          | 95.0 (90.0-100.0)   | 86.7 ± 18.4                 | 95.0 (85.0-100.0)   |
| <b>Social functioning</b>         | 87.5 ± 18.1                | 100.0 (75.0-100.0)  | 87.7 ± 18.0                                          | 100.0 (75.0-100.0)  | 85.8 ± 20.2                 | 100.0 (75.0-100.0)  |
| <b>Physical role functioning</b>  | 87.6 ± 28.4                | 100.0 (100.0-100.0) | 86.6 ± 29.4                                          | 100.0 (100.0-100.0) | 83.2 ± 32.4                 | 100.0 (75.0-100.0)  |
| <b>Emotional role functioning</b> | 91.3 ± 25.0                | 100.0 (100.0-100.0) | 90.8 ± 25.2                                          | 100.0 (100.0-100.0) | 87.8 ± 28.9                 | 100.0 (100.0-100.0) |
| <b>Mental health</b>              | 79.5 ± 13.4                | 84.0 (72.0-88.0)    | 80.0 ± 13.7                                          | 84.0 (72.0-88.0)    | 76.1 ± 15.5                 | 84.0 (72.0-92.0)    |
| <b>Vitality</b>                   | 67.8 ± 16.7                | 70.0 (60.0-80.0)    | 67.9 ± 17.0                                          | 70.0 (60.0-80.0)    | 66.1 ± 18.3                 | 70.0 (55.0-80.0)    |
| <b>Bodily pain</b>                | 85.1 ± 18.3                | 89.8 (77.6-100.0)   | 84.4 ± 19.1                                          | 89.8 (67.3-100.0)   | 83.1 ± 20.9                 | 89.8 (67.3-100.0)   |
| <b>General health</b>             | 73.7 ± 16.3                | 75.0 (65.0-85.0)    | 71.9 ± 16.7                                          | 75.0 (65.0-85.0)    | 67.5 ± 18.1                 | 70.0 (55.0-80.0)    |
|                                   | <b>NLR lowest quintile</b> |                     | <b>NLR 2<sup>nd</sup> to 4<sup>th</sup> quintile</b> |                     | <b>NLR highest quintile</b> |                     |
|                                   | Mean ± SD                  | Median (IQR)        | Mean ± SD                                            | Median (IQR)        | Mean ± SD                   | Median (IQR)        |
| <b>Physical functioning</b>       | 91.6 ± 13.4                | 95.0 (90.0-100.0)   | 90.6 ± 14.3                                          | 95.0 (90.0-100.0)   | 89.1 ± 15.7                 | 95.0 (85.0-100.0)   |
| <b>Social functioning</b>         | 88.3 ± 17.6                | 100.0 (75.0-100.0)  | 87.5 ± 18.2                                          | 100.0 (75.0-100.0)  | 86.5 ± 18.8                 | 100.0 (75.0-100.0)  |
| <b>Physical role functioning</b>  | 87.9 ± 28.0                | 100.0 (100.0-100.0) | 86.6 ± 29.4                                          | 100.0 (100.0-100.0) | 84.7 ± 31.1                 | 100.0 (100.0-100.0) |
| <b>Emotional role functioning</b> | 91.3 ± 24.6                | 100.0 (100.0-100.0) | 90.7 ± 25.4                                          | 100.0 (100.0-100.0) | 89.6 ± 26.8                 | 100.0 (100.0-100.0) |
| <b>Mental health</b>              | 79.8 ± 13.6                | 84.0 (72.0-88.0)    | 79.7 ± 13.8                                          | 84.0 (72.0-88.0)    | 79.2 ± 14.1                 | 84.0 (72.0-88.0)    |
| <b>Vitality</b>                   | 68.8 ± 16.8                | 70.0 (60.0-80.0)    | 67.7 ± 17.1                                          | 70.0 (55.0-80.0)    | 66.8 ± 17.4                 | 70.0 (55.0-80.0)    |
| <b>Bodily pain</b>                | 85.1 ± 18.5                | 89.8 (77.6-100.0)   | 84.5 ± 19.2                                          | 89.8 (67.3-100.0)   | 83.3 ± 19.9                 | 89.8 (67.3-100.0)   |
| <b>General health</b>             | 72.9 ± 16.4                | 75.0 (65.0-85.0)    | 71.8 ± 16.7                                          | 75.0 (62.5-85.0)    | 70.7 ± 17.3                 | 70.0 (60.0-85.0)    |

**SDC, Table 2. Absolute scores for the different domains of the RAND-36 health survey, stratified according to differential blood cell count abnormality.** NLR, neutrophil to lymphocyte ratio; WBC, white blood cell.

**SDC, Figure 1. Distribution of white blood cell and platelet counts in the evaluable Lifelines cohort (n=143191).** In order to improve visibility, figures were cropped at the extremes and a minor proportion of outliers in platelet count ( $>600 \times 10^9/L$ , n=52) and white blood cell count ( $>20 \times 10^9/L$ , n=34) were removed. WBC, white blood cell.

**SDC, Figure 2. Distribution of differential white blood cell counts in the evaluable Lifelines cohort (n=140890).** In order to improve visibility, figures were cropped at the extremes and a minor proportion of outliers in neutrophil count ( $>12 \times 10^9/L$ , n=57), lymphocyte count ( $>5 \times 10^9/L$ , n=3), monocyte count ( $>1.3 \times 10^9/L$ , n=67), eosinophil count ( $>1.3 \times 10^9/L$ , n=86), basophil count ( $>0.25 \times 10^9/L$ , n=8) and neutrophil to lymphocyte ratio ( $>10$ , n=50) were removed. NLR, neutrophil to lymphocyte ratio.

**SDC, Figure 3. Forest plots demonstrating the odds ratios for having a lower score than the (age- and sex-specific) 25th percentile cut-off per HRQoL subscale, according to different strata of blood cell counts.** Logistic regression analyses included body mass index, smoking status, alcohol use, and number of medications, presence of anemia and mean corpuscular volume as covariates. The following ranges in peripheral blood cell counts were used as the reference group: white blood cell count  $4-6 \times 10^9/L$ ; platelets  $250-300 \times 10^9/L$ ; neutrophils  $3-4 \times 10^9/L$ ; lymphocytes  $1.6-2.0 \times 10^9/L$ ; monocytes  $0.4-0.5 \times 10^9/L$ ; and NLR in the 3<sup>rd</sup> quintile. Circles indicate odds ratios for each domain, with horizontal lines corresponding to 95% confidence intervals. NLR, neutrophil to lymphocyte ratio; WBC, white blood cell.

**SDC, Figure 4. Percentage of individuals with a score below the age- and sex-specific cut-off value for the different domains of the RAND-36 health survey, stratified according to differential blood cell count abnormality and age group (<60 years and  $\geq 60$  years).** A circumflex (^) indicates a significant difference in the proportion below the age- and sex-specific cut-off value for individuals with neutropenia, lymphopenia, monocytopenia or lowest NLR quintile, as compared to individuals with a normal blood cell count. An asterisk (\*) indicates a significant difference in the proportion below the age- and sex-specific cut-off value for individuals with neutrophilia, lymphocytosis, monocytosis, eosinophilia or highest NLR quintile, as compared to individuals with a normal blood cell count. BP, bodily pain; GH, general health; MH, mental health; NLR, neutrophil to lymphocyte ratio; PF, physical functioning; RE, emotional role functioning; RF, physical role functioning; SF, social functioning; VT, vitality; WBC, white blood cell.

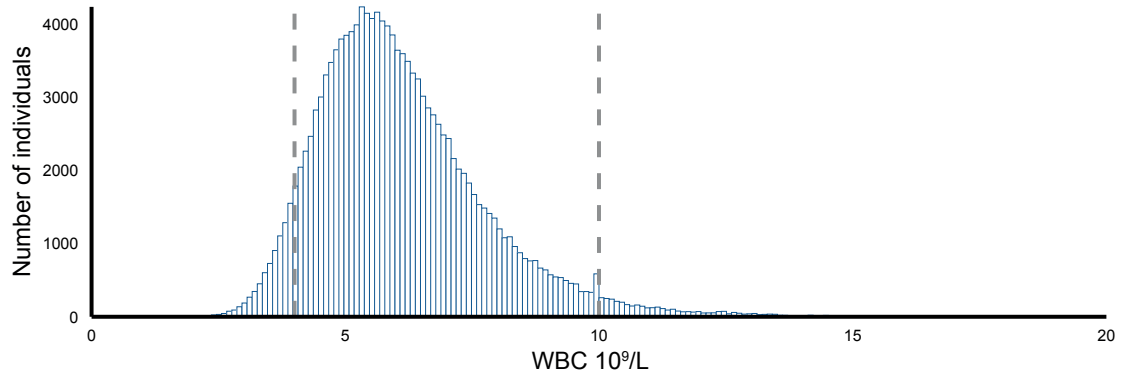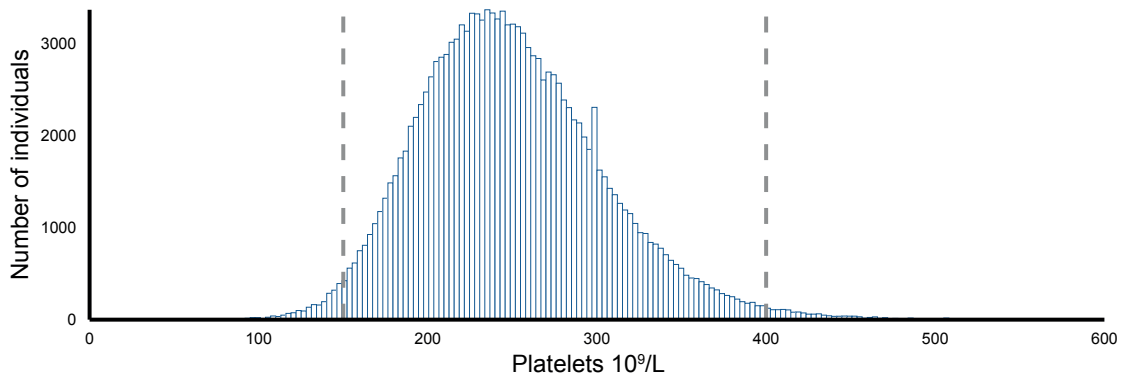



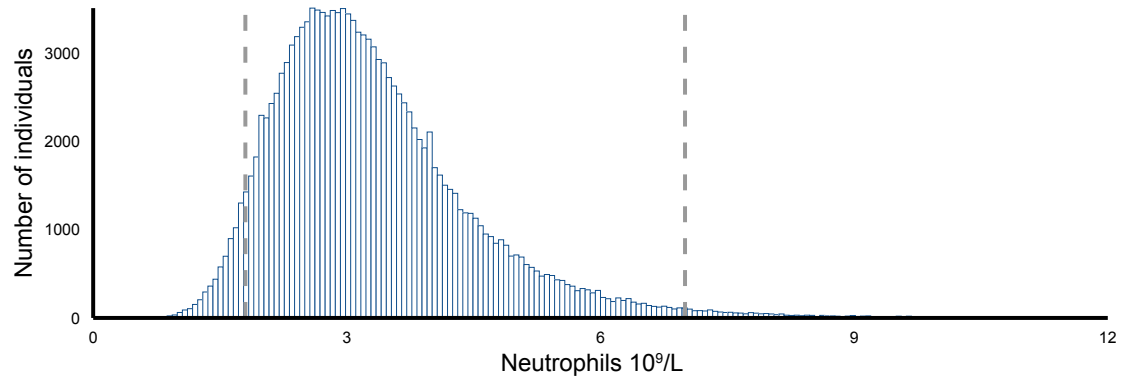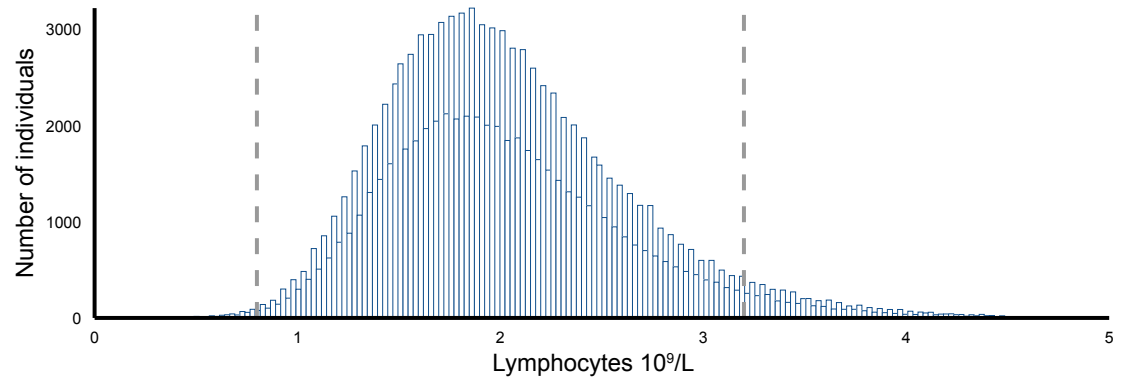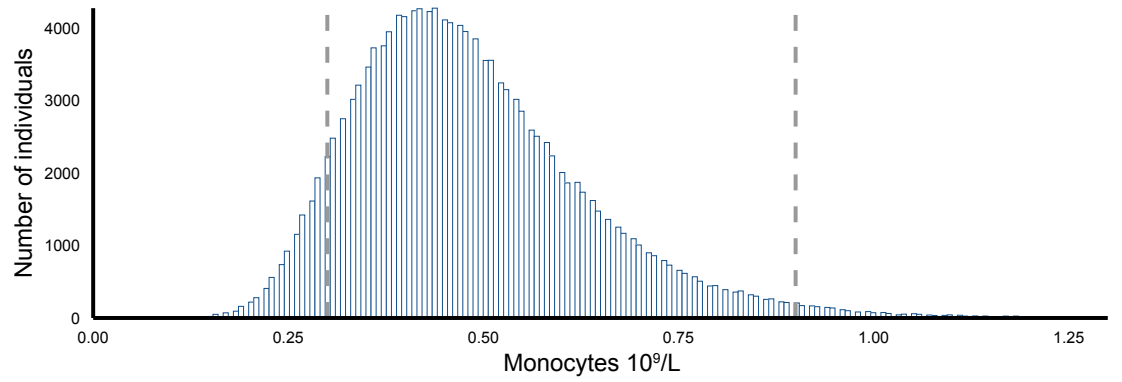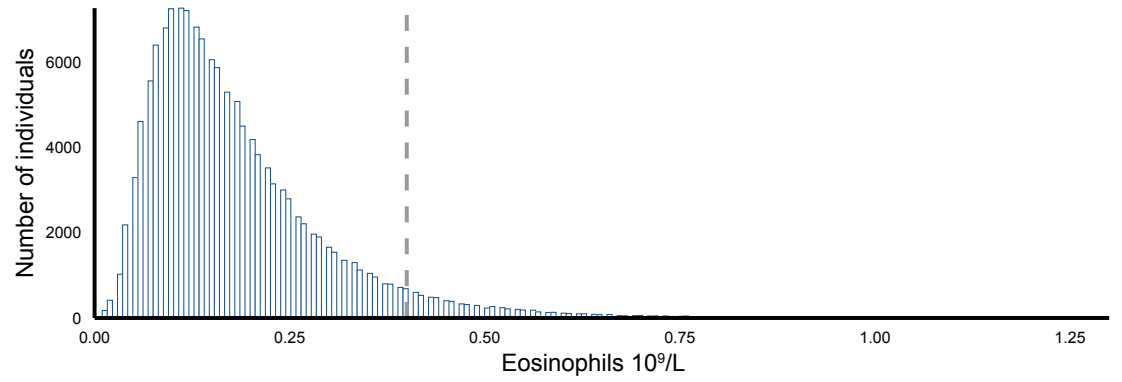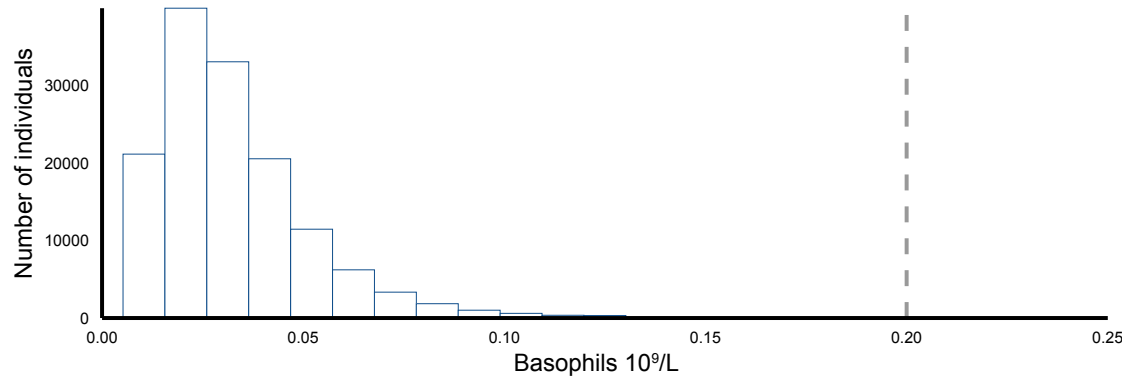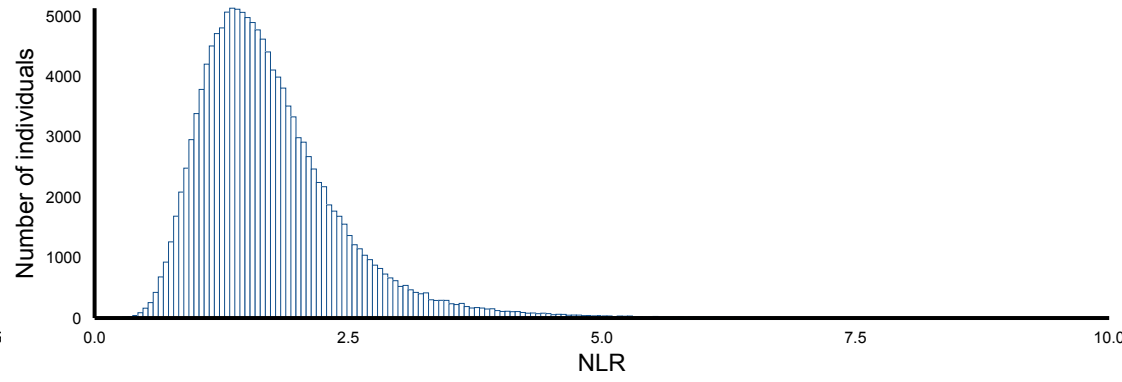

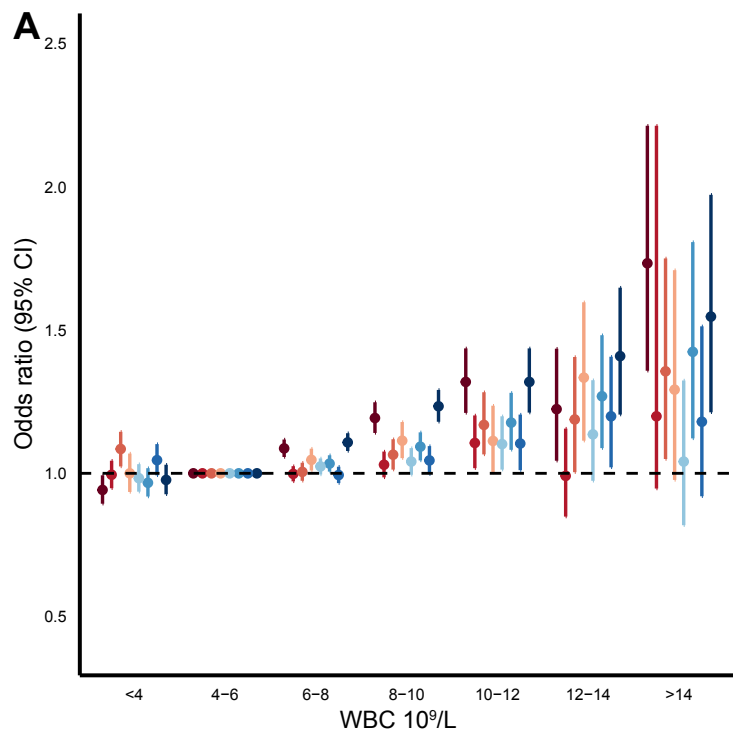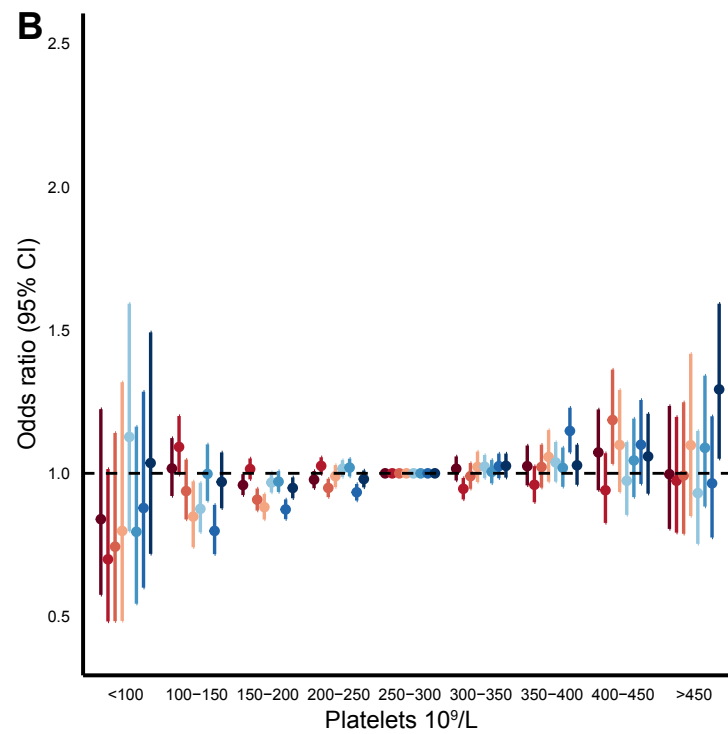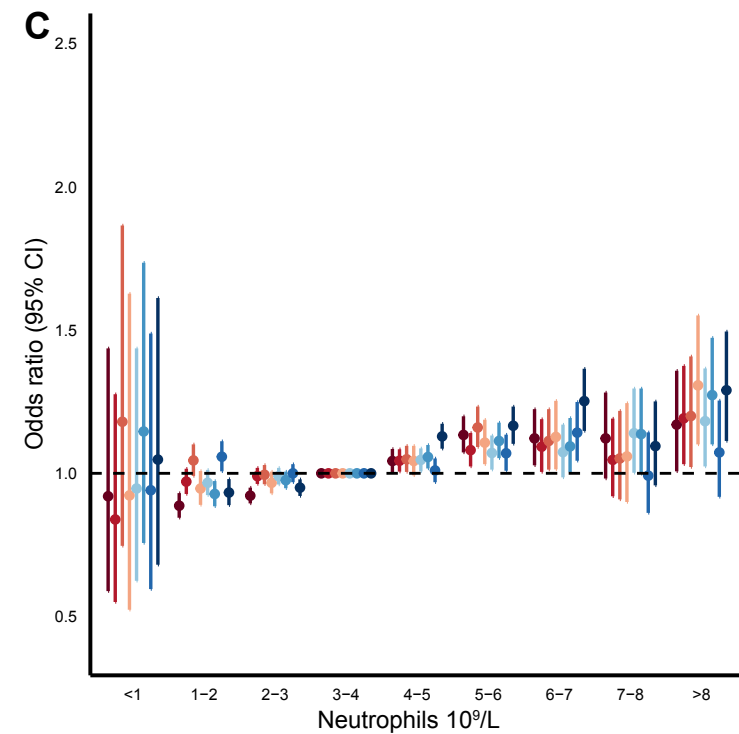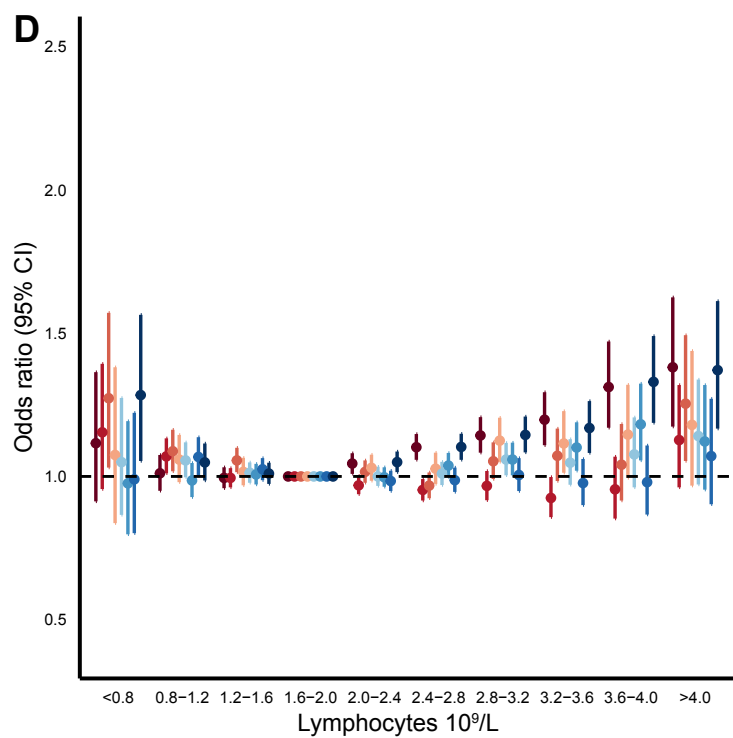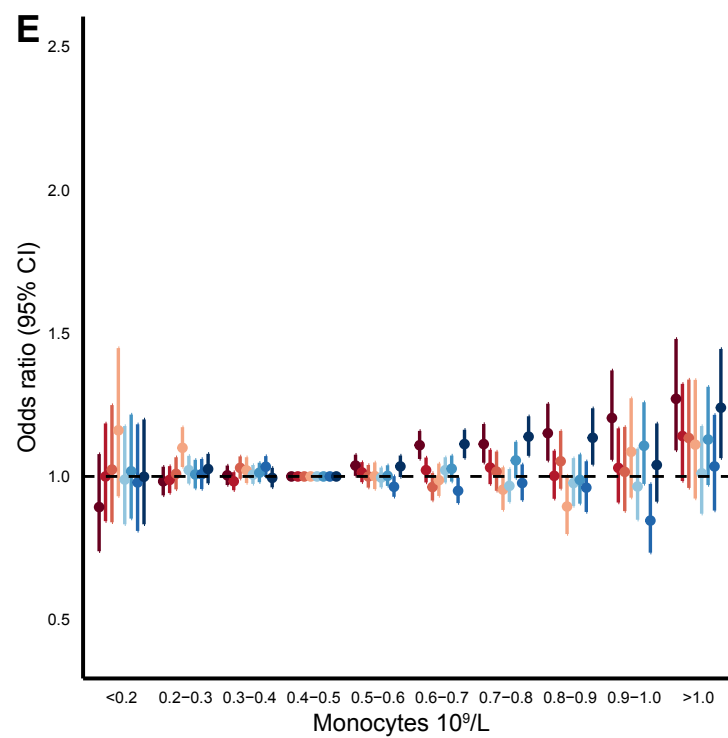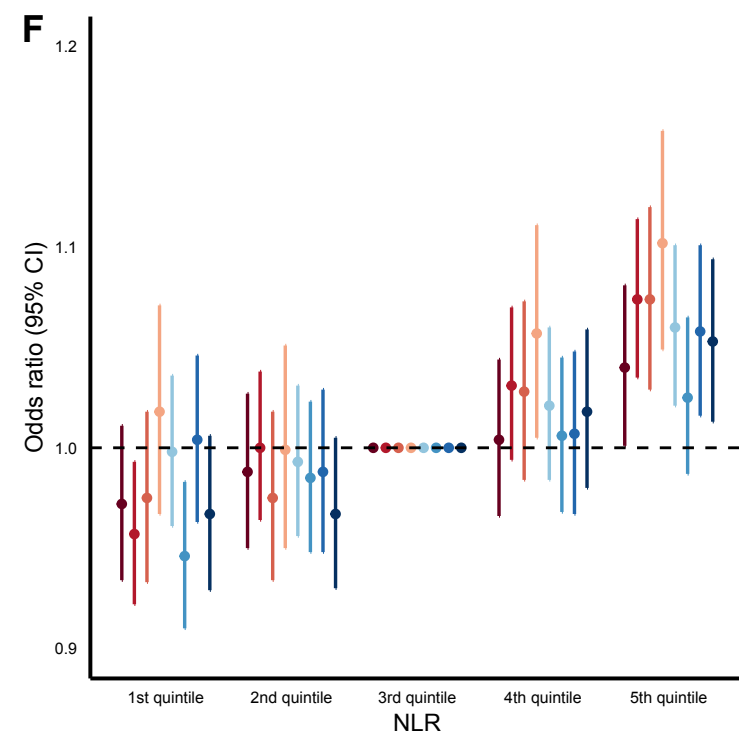

● Physical functioning  
 ● Social functioning  
 ● Physical role functioning  
 ● Emotional role functioning  
 ● Mental health  
 ● Vitality  
 ● Bodily pain  
 ● General health

**A Neutrophils < 60 years**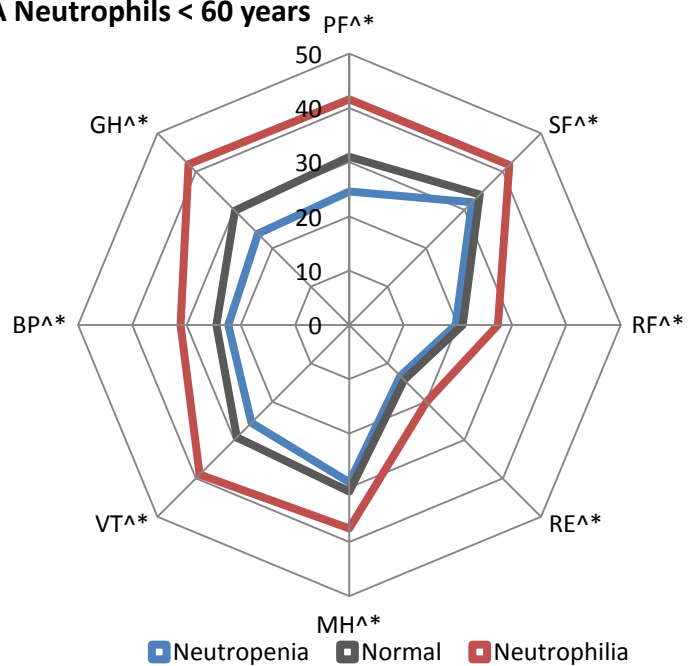**C Lymphocytes < 60 years**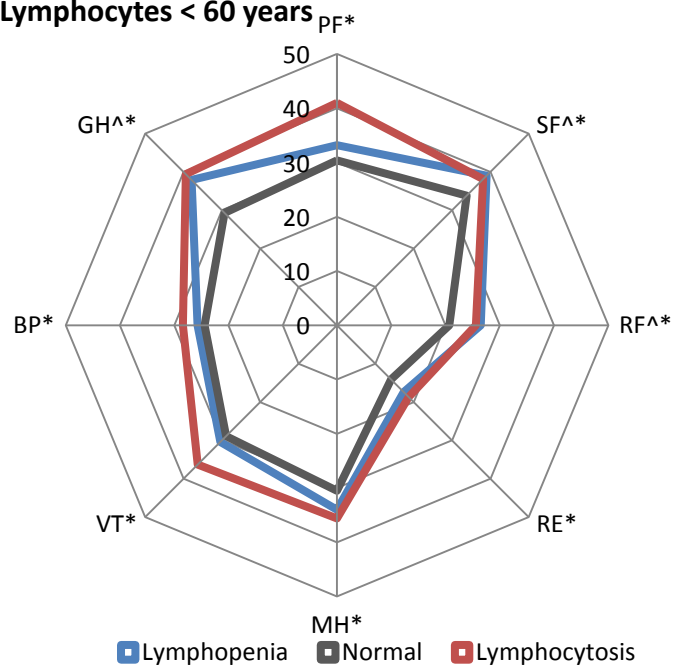**E Monocytes < 60 years**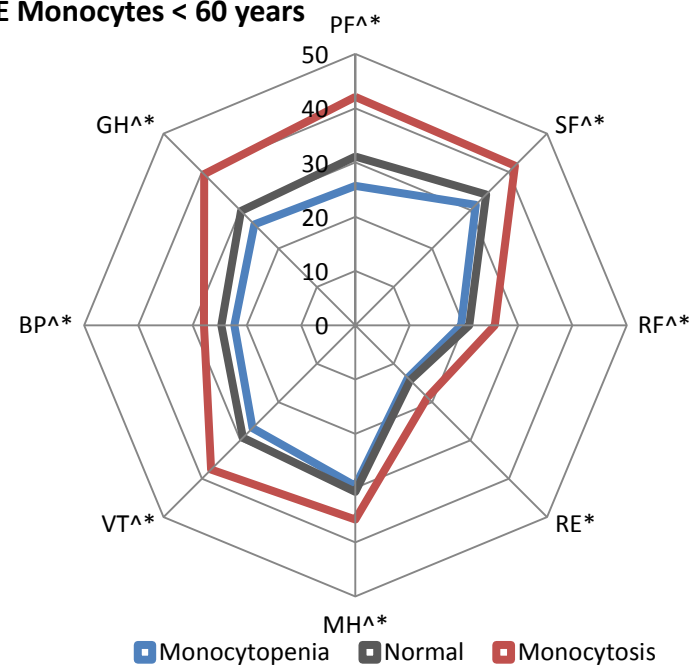**B Neutrophils ≥ 60 years**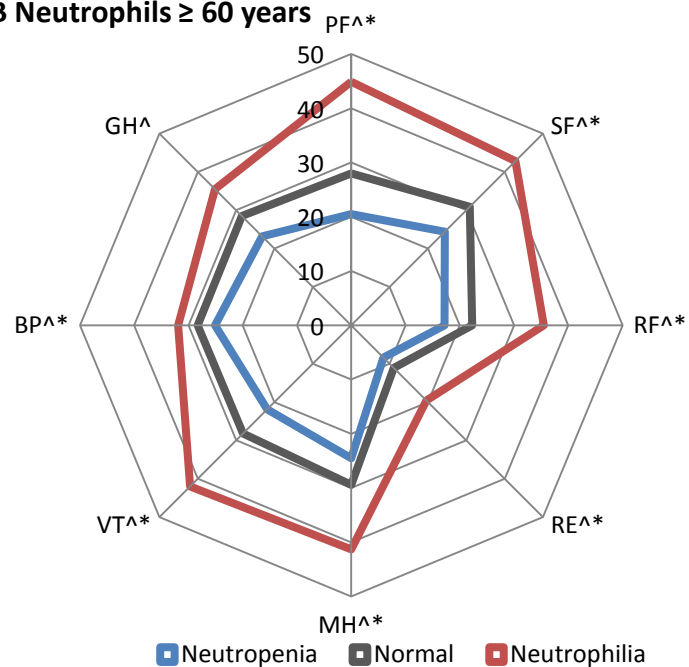**D Lymphocytes ≥ 60 years**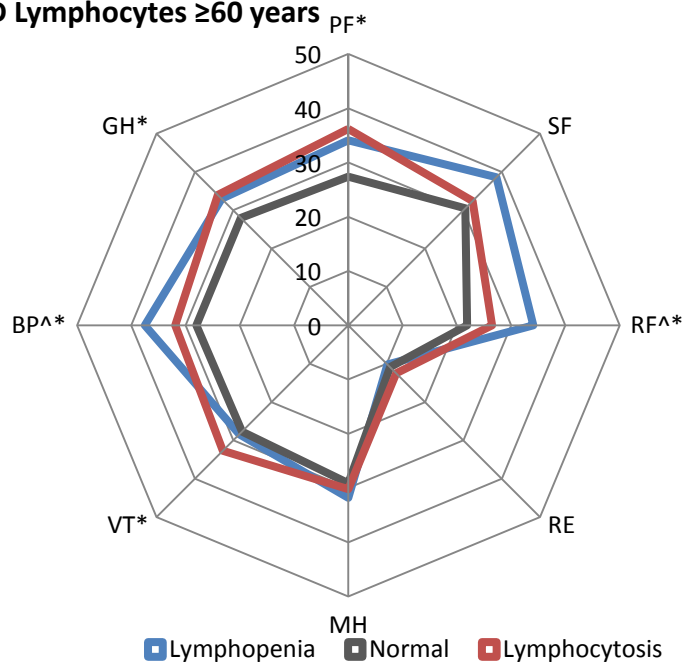**F Monocytes ≥ 60 years**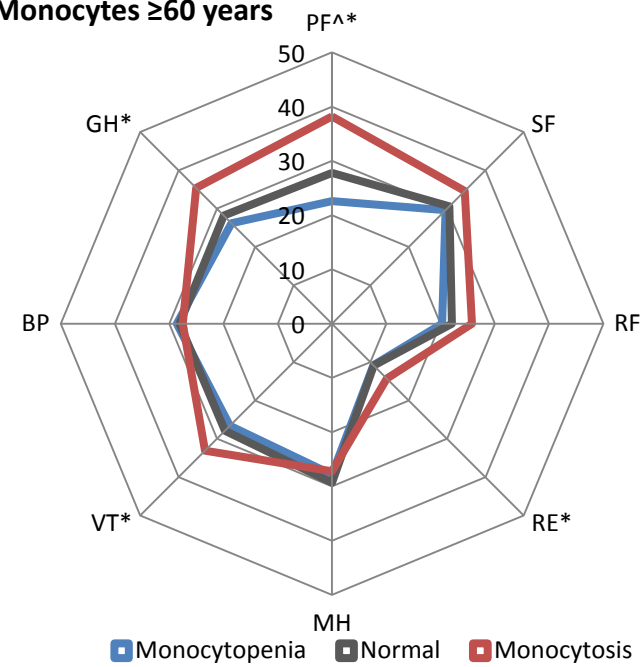

**G Eosinophils < 60 years**

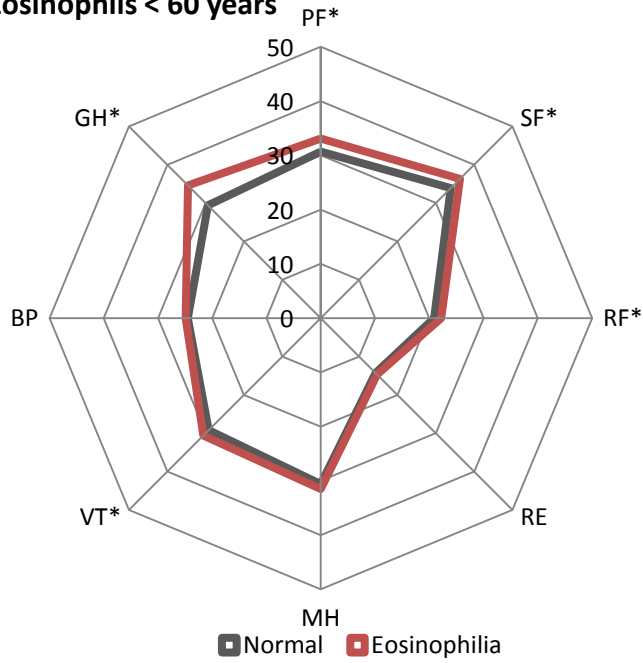

**I NLR < 60 years**

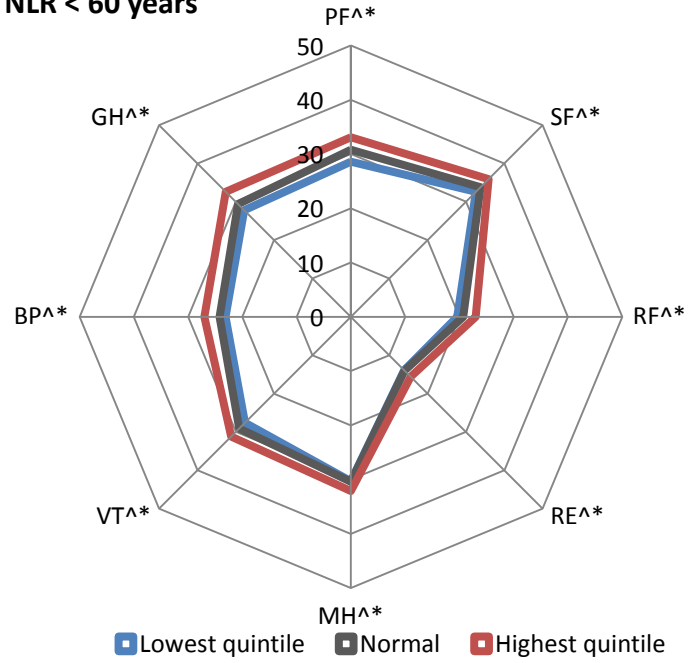

**H Eosinophils ≥ 60 years**

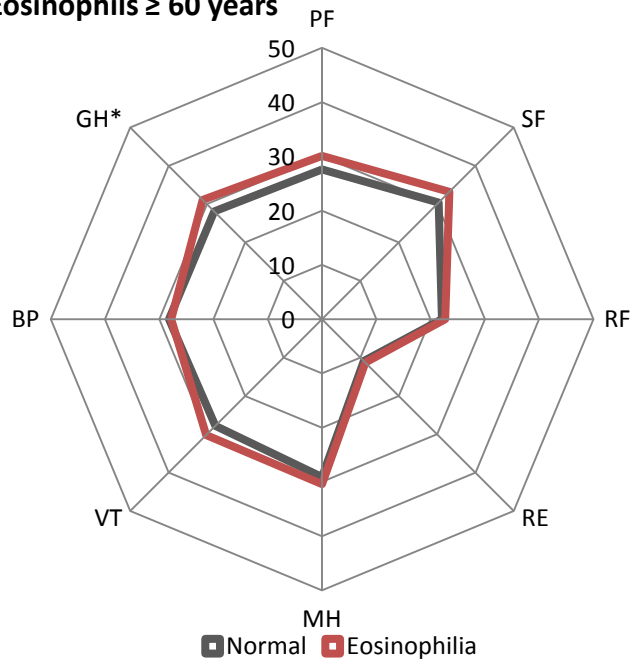

**J NLR ≥ 60 years**

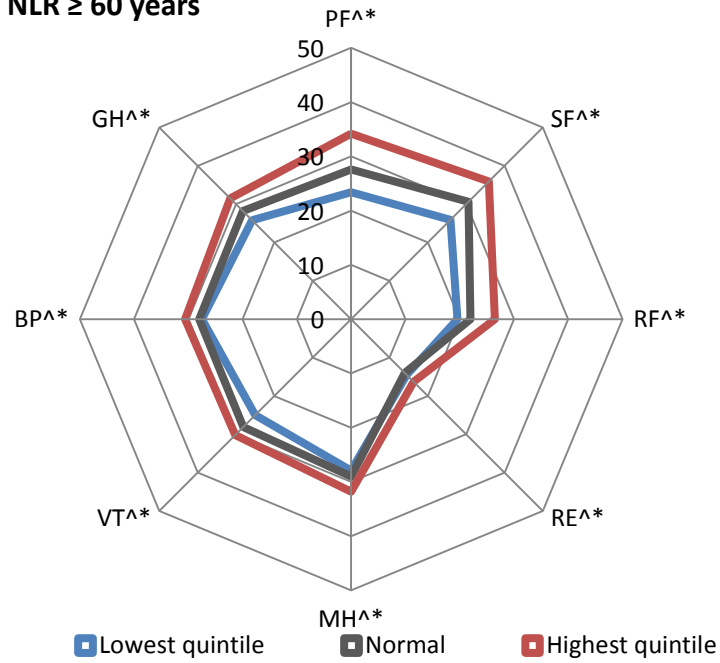

Supplement: hs9-5-e503-s001.pdf [file hs9-5-e503-s001.pdf]
